# Supplementary material for: Sunlight-activated yellow long persistent luminescence from Nb-doped Sr3SiO5:Eu2+ for warm-color mark applications
Source: Royal Society of Chemistry journal article supplement (doi:10.1039/c9tc05880j), 2019-11-28
Supplement: c9tc05880j1.pdf [file c9tc05880j1.pdf]

## Supporting Information

# Sunlight-activated Yellow long persistent luminescence from Nb-doped $\text{Sr}_3\text{SiO}_5\text{:Eu}^{2+}$ for warm-color mark applications

Zhizhen Wang<sup>†</sup>, Zhen Song<sup>†</sup>, Lixin Ning<sup>‡,\*</sup>, Quanlin Liu<sup>†,\*</sup>

<sup>†</sup>The Beijing Municipal Key Laboratory of New Energy Materials and Technologies, School of Materials Sciences and Engineering, University of Science and Technology Beijing, Beijing 100083, China

<sup>‡</sup>Anhui Key Laboratory of Optoelectric Materials Science and Technology, Key Laboratory of Functional Molecular Solids, Ministry of Education, Anhui Normal University, Wuhu 241000, P.R. China

**Table S1.** Main parameters of persistent luminescent materials having relatively good performance.

| Host material                                                  | Dopants                              | Persistent emission | Persistent        | Reference |
|----------------------------------------------------------------|--------------------------------------|---------------------|-------------------|-----------|
|                                                                |                                      | wavelength (nm)     | duration time (h) |           |
| CaAl <sub>2</sub> O <sub>4</sub>                               | Eu <sup>2+</sup> ,Nd <sup>3+</sup>   | 440                 | □5                | S1        |
| Sr <sub>3</sub> MgSi <sub>2</sub> O <sub>8</sub>               | Eu <sup>2+</sup> ,Dy <sup>3+</sup>   | 460                 | □10               | S1        |
| Sr <sub>2</sub> MgSi <sub>2</sub> O <sub>7</sub>               | Eu <sup>2+</sup> ,Dy <sup>3+</sup>   | 470                 | □10               | S1        |
| Sr <sub>4</sub> Al <sub>14</sub> O <sub>25</sub>               | Eu <sup>2+</sup> ,Dy <sup>3+</sup>   | 490                 | > 20              | S1        |
| SrAl <sub>2</sub> O <sub>4</sub>                               | Eu <sup>2+</sup> ,Dy <sup>3+</sup>   | 520                 | □30               | S1        |
| Y <sub>3</sub> Al <sub>2</sub> Ga <sub>3</sub> O <sub>12</sub> | Ce <sup>3+</sup> ,Yb <sup>3+</sup>   | 520                 | □100              | S2        |
| Ca <sub>2</sub> Al <sub>2</sub> SiO <sub>7</sub>               | Ce <sup>3+</sup> >> Mn <sup>2+</sup> | 550                 | □10               | S3        |
| CaGa <sub>2</sub> S <sub>4</sub>                               | Eu <sup>2+</sup> ,Ho <sup>3+</sup>   | 555                 | □0.5              | S1        |
| CdSiO <sub>3</sub>                                             | Mn <sup>2+</sup>                     | 575                 | □1                | S4        |
| Y <sub>2</sub> O <sub>2</sub> S                                | Ti <sup>3+</sup> /defects            | 594                 | > 5               | S4        |
| Ca <sub>2</sub> Si <sub>5</sub> N <sub>8</sub>                 | Eu <sup>2+</sup> ,Tm <sup>3+</sup>   | 620                 | □1                | S3        |
| (Ca,Sr)AlSiN <sub>3</sub>                                      | Eu <sup>2+</sup>                     | 628                 | □2                | S5        |
| CaS                                                            | Eu <sup>2+</sup> ,Tm <sup>3+</sup>   | 650                 | □1                | S3        |
| MgSiO <sub>3</sub>                                             | Eu <sup>2+</sup> >> Mn <sup>2+</sup> | 665                 | ~ 4               | S3        |

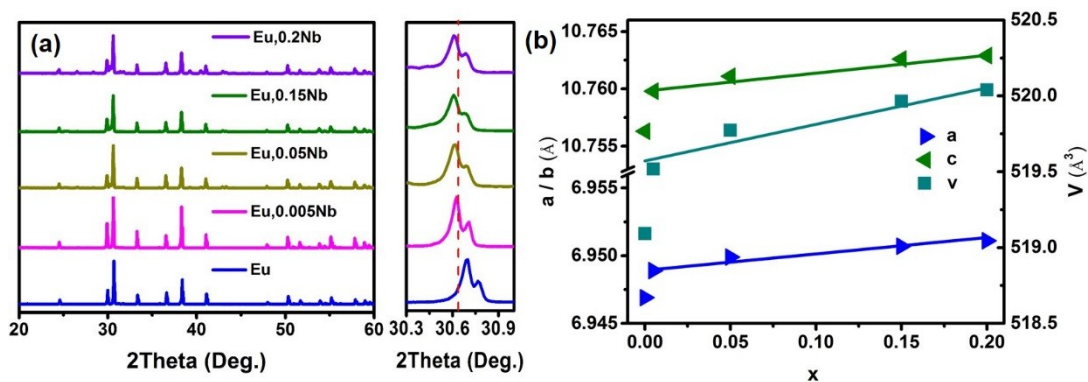**Figure S1.** a) XRD patterns of Sr<sub>3</sub>(Si<sub>1-x</sub>Nb<sub>x</sub>)O<sub>5</sub>:Eu<sup>2+</sup> ( $x = 0 - 0.2$ ) samples. All the samples are pure Sr<sub>3</sub>SiO<sub>5</sub> phases. b) Dependence of the lattice parameters and unit cells volume on  $x$  value. Cell parameters have a linear increase trend except  $x = 0$  sample.

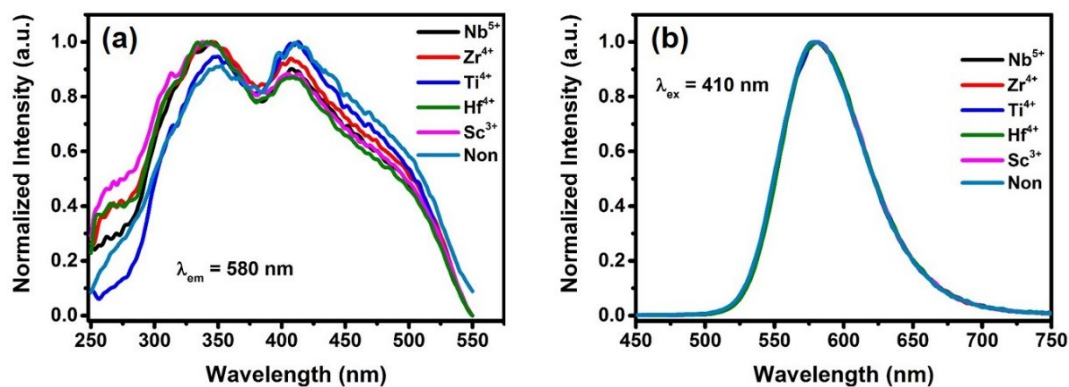

**Figure S2.** a) PLE spectra of  $\text{Sr}_3\text{SiO}_5:\text{Eu}^{2+}$  and  $\text{Sr}_3\text{SiO}_5:\text{Eu}^{2+}$ , TM phosphors measured under 580 nm emission wavelength at room temperature. b) PL spectra of all the phosphors measured under 410 nm excitation wavelength.

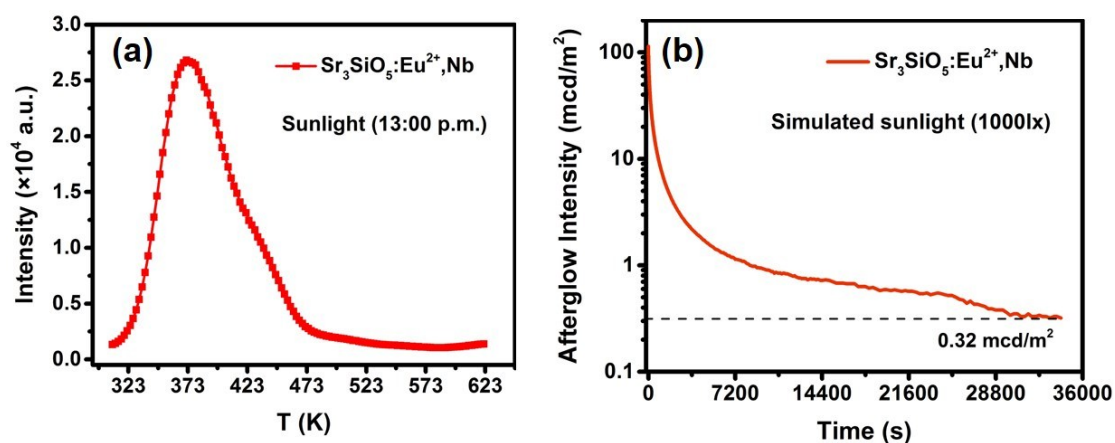

**Figure S3.** a) TL glow curve of  $\text{Sr}_3\text{SiO}_5:\text{Eu}^{2+}$ , Nb sample after 10 minutes charging by sunlight. b) Persistent luminescence decay curve of  $\text{Sr}_3\text{SiO}_5:\text{Eu}^{2+}$ , Nb after 10 minutes simulated sunlight (1000 lx) radiation.

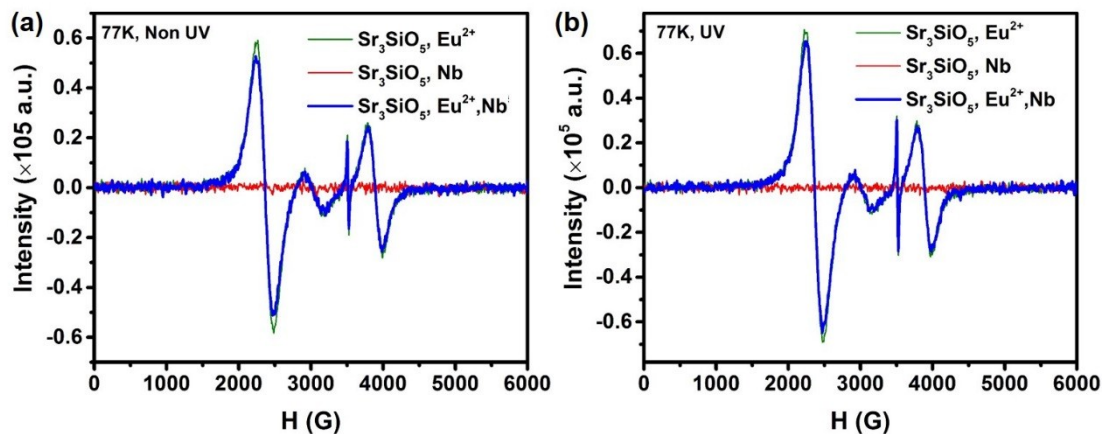

**Figure S4.** Low temperature (77 K) EPR spectra of  $\text{Sr}_3\text{SiO}_5:\text{Eu}^{2+}$  (green line), and  $\text{Sr}_3\text{SiO}_5$ , Nb (red

line) and  $\text{Sr}_3\text{SiO}_5:\text{Eu}^{2+}$ , Nb (blue line). a) Non UV. b) after 100 s UV radiation. Sharp signal at about 3520 G ( $g = 2.002$ ) corresponding to oxygen vacancies.

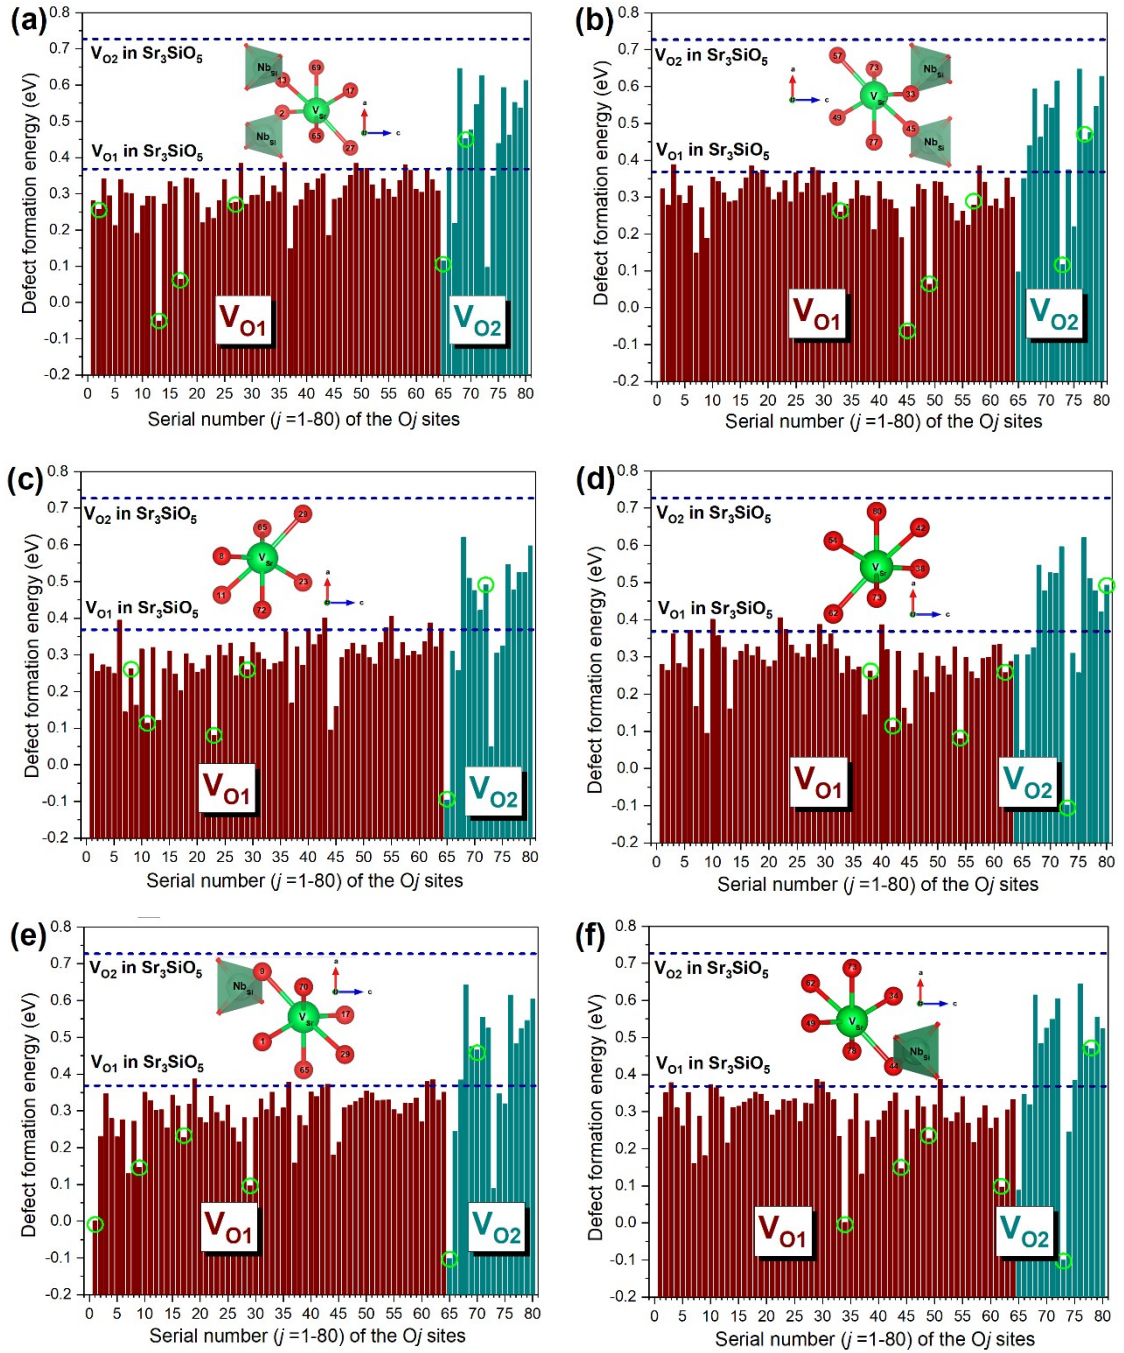

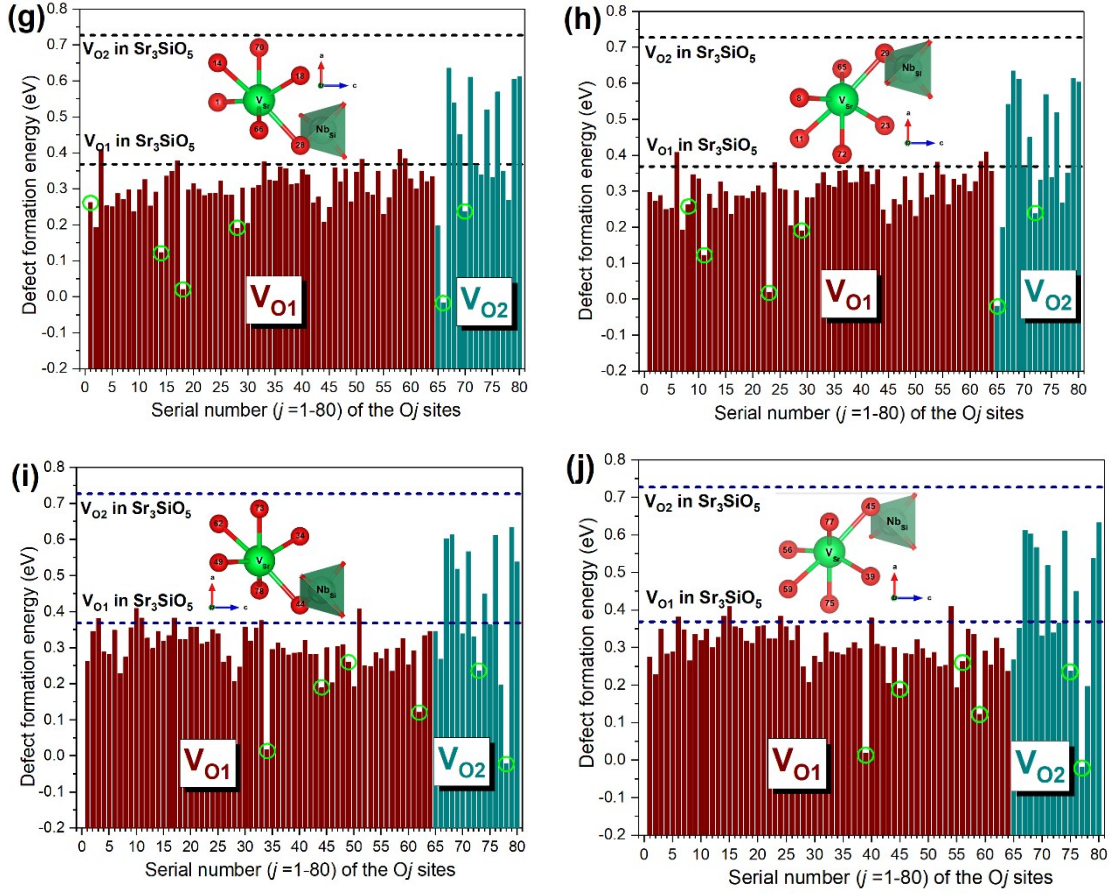

**Figure S5.** Calculated defect formation energies for oxygen vacancies in  $\text{Sr}_3\text{SiO}_5$  with incorporation of the ten most probable  $2\text{Nb}_{\text{Si}}-\text{V}_{\text{Sr}}$  configurations (a-h, in order of decreasing occurrence probability). The horizontal dash lines indicate the formation energies of the two symmetrically distinct oxygen vacancies ( $\text{V}_{\text{O1}}$  and  $\text{V}_{\text{O2}}$ ) in undoped  $\text{Sr}_3\text{SiO}_5$  for comparison. The green cycles denote the defect formation energies of oxygen vacancies in the coordination polyhedron of  $\text{V}_{\text{Sr}}$  (as shown pictorially in the inset).



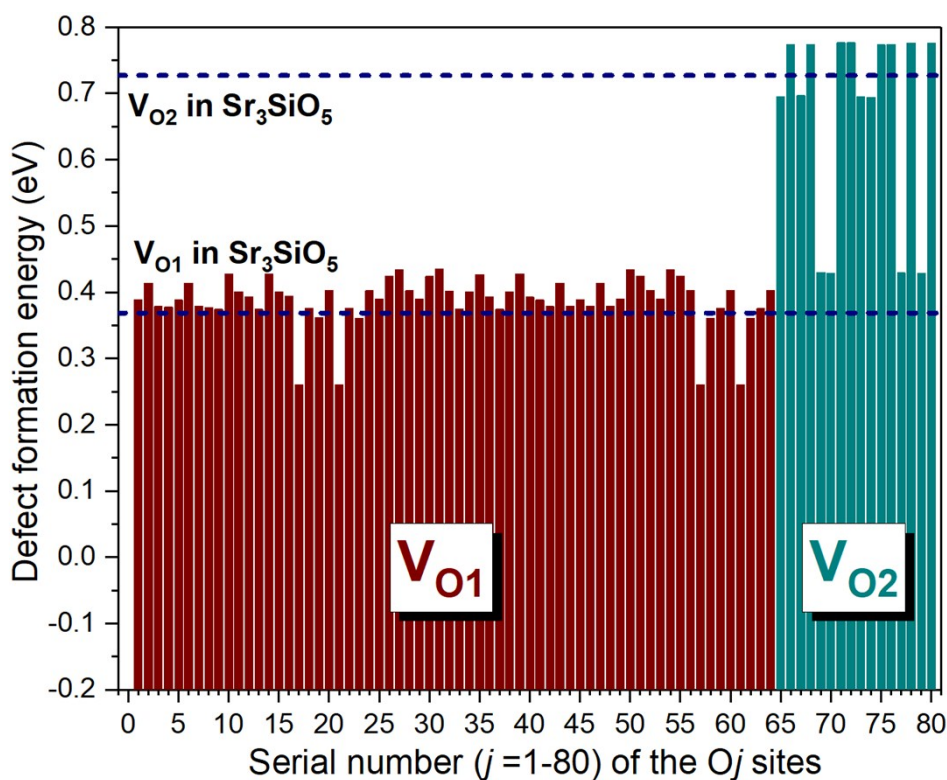

**Figure S6.** Calculated defect formation energies for oxygen vacancies in NbSi singly doped  $\text{Sr}_3\text{SiO}_5$ . The horizontal dash lines indicate the formation energies of the two symmetrically distinct oxygen vacancies ( $\text{V}_{\text{O}1}$  and  $\text{V}_{\text{O}2}$ ) in undoped  $\text{Sr}_3\text{SiO}_5$  for comparison.

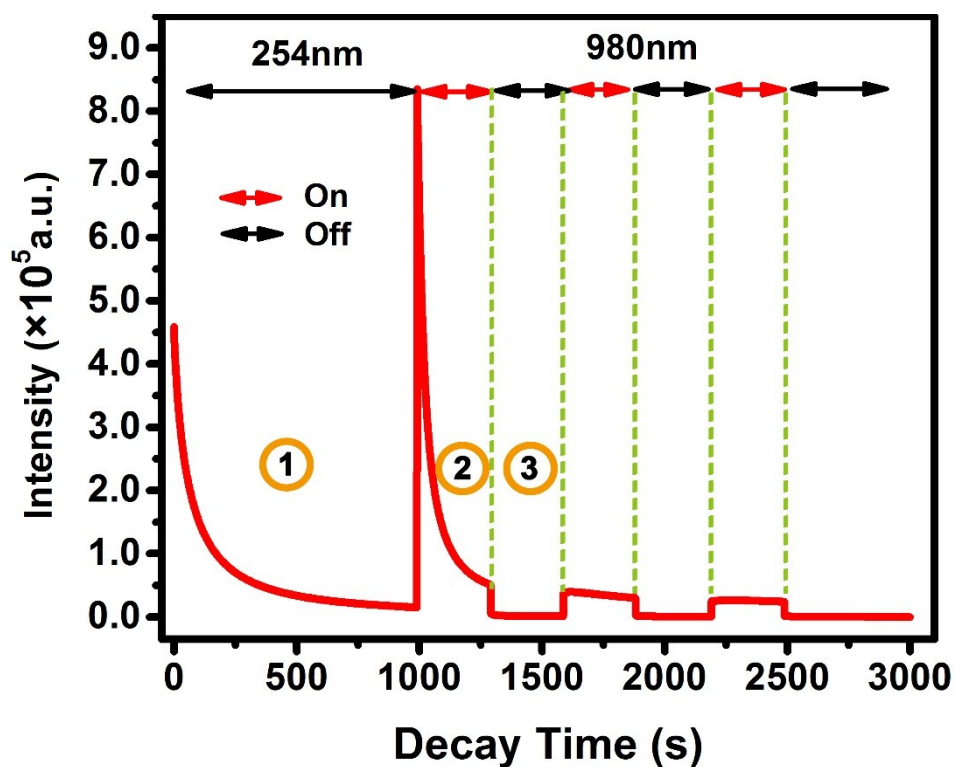

**Figure S7.** Persistent luminescence decay curve of the  $\text{Sr}_3\text{SiO}_5:\text{Eu}^{2+}$ , Nb phosphor with 980 nm NIR

photostimulation at room temperature. The red two-way arrow denoted as “On” present the 980 nm NIR light is on, and the black two-way arrow denoted as “Off” present the 980 nm NIR light is off. In the red curve, the NIR photo-stimulation from 1000 s to 2500 s is a pulsed type with repeating NIR on and off for each 300 s. Inset digital photographs of the sample were taken at <sup>①</sup> 500 s, <sup>②</sup> 1050 s and <sup>③</sup> 1350 s, respectively. This NIR photo-stimulation offers a way to read out information, which shows a potentiality on information storage-readout application.

## References

- S1 K. Van den Eeckhout, P. F. Smet, D. Poelman, *Mater.* **2010**, 3, 2536.
- S2 a) J. Ueda, S. Miyano, S. Tanabe, *ACS Appl. Mater. & Inter.* **2018**, 10, 20652; b) J. Xu, J. Ueda, K. Kuroishi, S. Tanabe, *Scripta Mater.* **2015**, 102, 47; c) J. Ueda, K. Kuroishi, S. Tanabe, *Appl. Phys. Lett.* **2014**, 104, 101904.
- S3 P. F. Smet, K. Van den Eeckhout, O. Q. De Clercq, D. Poelman, in *Handbook on the Physics and Chemistry of Rare Earths*, Elsevier, **2015**, 48: 1-108.
- S4 K. Van den Eeckhout, D. Poelman, P. F. Smet, *Mater.* **2013**, 6, 2789.
- S5 X. L. Liu, Z. Song, S. X. Wang, Q. L. Liu, *J. Lumin.* **2019**, 208, 313.
